# Supplementary material
Source: PubMed Central journal article supplement (PMC2842136)
Supplement: 0912807107_pnas.200912807SI.pdf [file 0912807107_pnas.200912807SI.pdf]

# Supporting Information

Li et al. 10.1073/pnas.0912807107

**Table S1. Highly replicative reassortant viruses between SK06 (H5N1) and Tok07 (H3N2) viruses**

| Virus No. | Virus name | Virus segments |     |    |    |    |    |   |    | CPE 48h   | Aliquot hour | Titer (pfu/mL)      | Plaque size |
|-----------|------------|----------------|-----|----|----|----|----|---|----|-----------|--------------|---------------------|-------------|
|           |            | PB2            | PB1 | PA | HA | NP | NA | M | NS |           |              |                     |             |
| 1         | r1         |                |     |    |    |    |    |   |    | +++       | 48           | 1.8×10 <sup>8</sup> | L           |
| 2         | r2         |                |     |    |    |    |    |   |    | ++        | 72           | 4×10 <sup>8</sup>   | M,L         |
| 4         | r4         |                |     |    |    |    |    |   |    | ++        | 72           | 3.5×10 <sup>7</sup> | L           |
| 6         | r6         |                |     |    |    |    |    |   |    | +         | 72           | 6.7×10 <sup>7</sup> | S           |
| 7         | r7         |                |     |    |    |    |    |   |    | +++       | 48           | 2.2×10 <sup>8</sup> | L           |
| 8         | r8         |                |     |    |    |    |    |   |    | ++++      | 48           | 1.4×10 <sup>8</sup> | L           |
| 9         | r1,2       |                |     |    |    |    |    |   |    | ++++      | 48           | 6.7×10 <sup>7</sup> | M,L         |
| 10        | r1,3       |                |     |    |    |    |    |   |    | +/+++     | 48           | 1.1×10 <sup>7</sup> | L           |
| 11        | r1,4       |                |     |    |    |    |    |   |    | +++       | 48           | 6.3×10 <sup>7</sup> | L           |
| 13        | r1,6       |                |     |    |    |    |    |   |    | +++       | 48           | 3.5×10 <sup>8</sup> | S           |
| 14        | r1,7       |                |     |    |    |    |    |   |    | ++++      | 48           | 7.4×10 <sup>8</sup> | L           |
| 15        | r1,8       |                |     |    |    |    |    |   |    | ++++      | 48           | 3.1×10 <sup>8</sup> | L           |
| 16        | r2,3       |                |     |    |    |    |    |   |    | ++        | 72           | 1.3×10 <sup>7</sup> | S           |
| 17        | r2,4       |                |     |    |    |    |    |   |    | ++        | 72           | 2.8×10 <sup>7</sup> | L           |
| 19        | r2,6       |                |     |    |    |    |    |   |    | +++       | 48           | 6.8×10 <sup>7</sup> | S           |
| 20        | r2,7       |                |     |    |    |    |    |   |    | +++       | 48           | 3.1×10 <sup>8</sup> | M,L         |
| 21        | r2,8       |                |     |    |    |    |    |   |    | ++++      | 48           | 4.9×10 <sup>8</sup> | L           |
| 28        | r4,6       |                |     |    |    |    |    |   |    | +/++      | 72           | 4.1×10 <sup>7</sup> | S,M         |
| 29        | r4,7       |                |     |    |    |    |    |   |    | +         | 72           | 3.8×10 <sup>7</sup> | S           |
| 34        | r6,7       |                |     |    |    |    |    |   |    | +         | 72           | 5.7×10 <sup>7</sup> | S           |
| 35        | r6,8       |                |     |    |    |    |    |   |    | ++++      | 48           | 2×10 <sup>8</sup>   | S           |
| 36        | r7,8       |                |     |    |    |    |    |   |    | ++++      | 48           | 1.3×10 <sup>8</sup> | L           |
| 37        | r1,2,3     |                |     |    |    |    |    |   |    | ++        | 72           | 1.1×10 <sup>8</sup> | L           |
| 38        | r1,2,4     |                |     |    |    |    |    |   |    | +++       | 48           | 5.6×10 <sup>7</sup> | L           |
| 40        | r1,2,6     |                |     |    |    |    |    |   |    | ++        | 72           | 1.1×10 <sup>8</sup> | S           |
| 41        | r1,2,7     |                |     |    |    |    |    |   |    | ++        | 72           | 4.1×10 <sup>8</sup> | L           |
| 42        | r1,2,8     |                |     |    |    |    |    |   |    | ++++      | 48           | 7.8×10 <sup>8</sup> | L           |
| 43        | r1,3,4     |                |     |    |    |    |    |   |    | +++       | 48           | 9×10 <sup>7</sup>   | L           |
| 45        | r1,3,6     |                |     |    |    |    |    |   |    | +++       | 48           | 1.6×10 <sup>8</sup> | S           |
| 46        | r1,3,7     |                |     |    |    |    |    |   |    | ++++      | 48           | 5×10 <sup>8</sup>   | L           |
| 47        | r1,3,8     |                |     |    |    |    |    |   |    | ++++      | 48           | 1.1×10 <sup>8</sup> | M           |
| 49        | r1,4,6     |                |     |    |    |    |    |   |    | +/+++     | 48           | 4.2×10 <sup>7</sup> | L           |
| 50        | r1,4,7     |                |     |    |    |    |    |   |    | ++        | 72           | 5.1×10 <sup>7</sup> | S,M,L       |
| 51        | r1,4,8     |                |     |    |    |    |    |   |    | ++++      | 48           | 1.2×10 <sup>7</sup> | M,L         |
| 55        | r1,6,7     |                |     |    |    |    |    |   |    | ++++      | 48           | 4.9×10 <sup>8</sup> | S           |
| 56        | r1,6,8     |                |     |    |    |    |    |   |    | ++++      | 48           | 4.6×10 <sup>8</sup> | S           |
| 57        | r1,7,8     |                |     |    |    |    |    |   |    | ++++      | 48           | 6×10 <sup>8</sup>   | L           |
| 66        | r2,4,8     |                |     |    |    |    |    |   |    | +         | 72           | 1.4×10 <sup>7</sup> | M           |
| 70        | r2,6,7     |                |     |    |    |    |    |   |    | +         | 72           | 2.6×10 <sup>8</sup> | S           |
| 71        | r2,6,8     |                |     |    |    |    |    |   |    | ++++      | 48           | 2.7×10 <sup>8</sup> | S           |
| 72        | r2,7,8     |                |     |    |    |    |    |   |    | ++++      | 48           | 2.3×10 <sup>8</sup> | L           |
| 87        | r4,6,8     |                |     |    |    |    |    |   |    | ++        | 72           | 5.7×10 <sup>7</sup> | S,M         |
| 91        | r5,7,8     |                |     |    |    |    |    |   |    | -/+       | 72           | 7×10 <sup>7</sup>   | M,L         |
| 92        | r6,7,8     |                |     |    |    |    |    |   |    | ++++      | 48           | 2.1×10 <sup>7</sup> | S           |
| 95        | r1,2,3,6   |                |     |    |    |    |    |   |    | +++       | 48           | 1.8×10 <sup>8</sup> | S           |
| 96        | r1,2,3,7   |                |     |    |    |    |    |   |    | ++++      | 48           | 1.3×10 <sup>8</sup> | L           |
| 97        | r1,2,3,8   |                |     |    |    |    |    |   |    | ++++      | 48           | 7×10 <sup>7</sup>   | L           |
| 105       | r1,2,6,7   |                |     |    |    |    |    |   |    | +/+++     | 48           | 1.6×10 <sup>8</sup> | S           |
| 106       | r1,2,6,8   |                |     |    |    |    |    |   |    | ++++      | 48           | 1.9×10 <sup>8</sup> | S           |
| 107       | r1,2,7,8   |                |     |    |    |    |    |   |    | ++++      | 48           | 3.8×10 <sup>8</sup> | L           |
| 109       | r1,3,4,6   |                |     |    |    |    |    |   |    | ++        | 72           | 3.2×10 <sup>7</sup> | L           |
| 110       | r1,3,4,7   |                |     |    |    |    |    |   |    | +/++      | 72           | 1.4×10 <sup>8</sup> | L           |
| 111       | r1,3,4,8   |                |     |    |    |    |    |   |    | +++/>++++ | 48           | 4.2×10 <sup>7</sup> | M,L         |
| 113       | r1,3,5,7   |                |     |    |    |    |    |   |    | +         | 72           | 1.7×10 <sup>7</sup> | S           |

Table S1. Cont.

|     |                |  |  |  |  |  |  |  |  |           |    |                     |       |
|-----|----------------|--|--|--|--|--|--|--|--|-----------|----|---------------------|-------|
| 115 | r1,3,6,7       |  |  |  |  |  |  |  |  | ++++      | 48 | 1.4×10 <sup>8</sup> | M     |
| 116 | r1,3,6,8       |  |  |  |  |  |  |  |  | ++++      | 48 | 5.8×10 <sup>7</sup> | S     |
| 117 | r1,3,7,8       |  |  |  |  |  |  |  |  | ++++      | 48 | 1.3×10 <sup>8</sup> | L     |
| 122 | r1,4,6,8       |  |  |  |  |  |  |  |  | +++ /++++ | 48 | 3.9×10 <sup>7</sup> | L     |
| 123 | r1,4,7,8       |  |  |  |  |  |  |  |  | ++++      | 48 | 2×10 <sup>7</sup>   | L     |
| 127 | r1,6,7,8       |  |  |  |  |  |  |  |  | ++++      | 48 | 8.3×10 <sup>7</sup> | S     |
| 146 | r2,5,7,8       |  |  |  |  |  |  |  |  | +         | 72 | 2×10 <sup>8</sup>   | L     |
| 147 | r2,6,7,8       |  |  |  |  |  |  |  |  | ++++      | 48 | 4.3×10 <sup>7</sup> | S     |
| 164 | r1,2,3,4,6     |  |  |  |  |  |  |  |  | +         | 72 | 4×10 <sup>7</sup>   | L     |
| 165 | r1,2,3,4,7     |  |  |  |  |  |  |  |  | +         | 72 | 2.9×10 <sup>7</sup> | L     |
| 166 | r1,2,3,4,8     |  |  |  |  |  |  |  |  | ++++      | 48 | 2.7×10 <sup>7</sup> | L     |
| 168 | r1,2,3,5,7     |  |  |  |  |  |  |  |  | +         | 72 | 3.9×10 <sup>7</sup> | S,M,L |
| 170 | r1,2,3,6,7     |  |  |  |  |  |  |  |  | +++ /++++ | 48 | 2.2×10 <sup>8</sup> | S     |
| 171 | r1,2,3,6,8     |  |  |  |  |  |  |  |  | ++++      | 48 | 2.5×10 <sup>7</sup> | S     |
| 172 | r1,2,3,7,8     |  |  |  |  |  |  |  |  | ++++      | 24 | 6×10 <sup>8</sup>   | L     |
| 177 | r1,2,4,6,8     |  |  |  |  |  |  |  |  | +++       | 48 | 2.8×10 <sup>7</sup> | L     |
| 178 | r1,2,4,7,8     |  |  |  |  |  |  |  |  | ++++      | 48 | 7×10 <sup>7</sup>   | M,L   |
| 179 | r1,2,5,6,7     |  |  |  |  |  |  |  |  | -/+       | 72 | 1×10 <sup>7</sup>   | S     |
| 180 | r1,2,5,6,8     |  |  |  |  |  |  |  |  | ++++      | 48 | 7×10 <sup>7</sup>   | S     |
| 181 | r1,2,5,7,8     |  |  |  |  |  |  |  |  | ++++      | 48 | 1.9×10 <sup>7</sup> | M,L   |
| 182 | r1,2,6,7,8     |  |  |  |  |  |  |  |  | +++ /++++ | 24 | 2.1×10 <sup>7</sup> | S     |
| 186 | r1,3,4,6,7     |  |  |  |  |  |  |  |  | +         | 72 | 2.8×10 <sup>7</sup> | L     |
| 187 | r1,3,4,6,8     |  |  |  |  |  |  |  |  | +++       | 48 | 1.2×10 <sup>8</sup> | M,L   |
| 188 | r1,3,4,7,8     |  |  |  |  |  |  |  |  | ++++      | 48 | 8.4×10 <sup>7</sup> | L     |
| 191 | r1,3,5,7,8     |  |  |  |  |  |  |  |  | +++       | 48 | 2×10 <sup>7</sup>   | S,M   |
| 192 | r1,3,6,7,8     |  |  |  |  |  |  |  |  | ++++      | 48 | 2.1×10 <sup>8</sup> | S     |
| 197 | r1,5,6,7,8     |  |  |  |  |  |  |  |  | ++++      | 48 | 1×10 <sup>7</sup>   | S     |
| 221 | r1,2,3,4,5,8   |  |  |  |  |  |  |  |  | ++        | 72 | 1.2×10 <sup>7</sup> | S,M   |
| 223 | r1,2,3,4,6,8   |  |  |  |  |  |  |  |  | + /++     | 72 | 2×10 <sup>7</sup>   | L     |
| 224 | r1,2,3,4,7,8   |  |  |  |  |  |  |  |  | ++        | 72 | 5.1×10 <sup>7</sup> | L     |
| 226 | r1,2,3,5,6,8   |  |  |  |  |  |  |  |  | +++       | 48 | 2.4×10 <sup>8</sup> | S     |
| 227 | r1,2,3,5,7,8   |  |  |  |  |  |  |  |  | +++       | 48 | 3.4×10 <sup>8</sup> | L     |
| 228 | r1,2,3,6,7,8   |  |  |  |  |  |  |  |  | ++++      | 48 | 3×10 <sup>8</sup>   | M     |
| 233 | r1,2,5,6,7,8   |  |  |  |  |  |  |  |  | ++++      | 48 | 2.2×10 <sup>8</sup> | S,M   |
| 236 | r1,3,4,5,7,8   |  |  |  |  |  |  |  |  | +         | 72 | 1.5×10 <sup>7</sup> | M     |
| 237 | r1,3,4,6,7,8   |  |  |  |  |  |  |  |  | ++        | 72 | 2.6×10 <sup>7</sup> | M     |
| 238 | r1,3,5,6,7,8   |  |  |  |  |  |  |  |  | ++++      | 48 | 7×10 <sup>7</sup>   | S     |
| 248 | r1,2,3,4,5,6,8 |  |  |  |  |  |  |  |  | ++        | 72 | 9×10 <sup>8</sup>   | L     |
| 249 | r1,2,3,4,5,7,8 |  |  |  |  |  |  |  |  | ++        | 72 | 1.2×10 <sup>8</sup> | L     |
| 250 | r1,2,3,4,6,7,8 |  |  |  |  |  |  |  |  | + /++     | 72 | 3.4×10 <sup>7</sup> | L     |
| 251 | r1,2,3,5,6,7,8 |  |  |  |  |  |  |  |  | ++++      | 48 | 3.2×10 <sup>8</sup> | M     |
| 253 | r1,3,4,5,6,7,8 |  |  |  |  |  |  |  |  | +         | 72 | 1.1×10 <sup>8</sup> | S,M   |
| 255 | Tok07          |  |  |  |  |  |  |  |  | ++ /+++   | 48 | 4.2×10 <sup>7</sup> | L     |
| 256 | SK06           |  |  |  |  |  |  |  |  | +++       | 48 | 1.8×10 <sup>8</sup> | L     |

The parental or reassortant viruses were generated by reverse genetics as described in *Materials and Methods*. The transfection supernatant from 293T cells was collected at 48 h posttransfection and used to infect Madin-Darby canine kidney (MDCK) cells. The cytopathic effects (CPE) of MDCK cells were checked at 48 h postinfection (with two exceptions, r1,2,3,7,8 and r1,2,6,7,8) and recorded on a scale ranging from “-” (no CPE) to “++++” (obvious CPE; all cells died and detached). “r” in the virus names denotes reassortant. The numbers in the virus names indicate segments derived from the Tok07 virus as follows: 1, *PB2*; 2, *PB1*; 3, *PA*; 4, *HA*; 5, *NP*; 6, *NA*; 7, *M*; and 8, *NS*. The virus segments derived from the SK06 virus were not assigned numbers. Gene segments derived from Tok07 virus are shown in gray, while those derived from SK06 virus are shown in rose. The virus titers were determined by plaque assay on MDCK cells, and the plaque sizes were roughly determined by eye as small (S), medium (M), or large (L).

**Table S2. Moderately replicative reassortant viruses between SK06 (H5N1) and Tok07 (H3N2) viruses**

| Virus No. | Virus name     | Virus segments |     |    |    |    |    |   |    | CPE 48h   | Aliquot hour | Titer (pfu/mL)      | Plaque size |
|-----------|----------------|----------------|-----|----|----|----|----|---|----|-----------|--------------|---------------------|-------------|
|           |                | PB2            | PB1 | PA | HA | NP | NA | M | NS |           |              |                     |             |
| 3         | r3             |                |     |    |    |    |    |   |    | +++       | 48           | 2×10 <sup>6</sup>   | S           |
| 22        | r3,4           |                |     |    |    |    |    |   |    | +         | 72           | 9×10 <sup>6</sup>   | L           |
| 24        | r3,6           |                |     |    |    |    |    |   |    | -         | 72           | 3.2×10 <sup>4</sup> | S           |
| 25        | r3,7           |                |     |    |    |    |    |   |    | +         | 72           | 1.9×10 <sup>6</sup> | M           |
| 30        | r4,8           |                |     |    |    |    |    |   |    | ++        | 72           | 8.7×10 <sup>6</sup> | S           |
| 33        | r5,8           |                |     |    |    |    |    |   |    | +         | 72           | 3.3×10 <sup>6</sup> | S,M         |
| 44        | r1,3,5         |                |     |    |    |    |    |   |    | -/+       | 72           | 7×10 <sup>4</sup>   | S           |
| 52        | r1,5,6         |                |     |    |    |    |    |   |    | +         | 72           | 1.3×10 <sup>6</sup> | S           |
| 53        | r1,5,7         |                |     |    |    |    |    |   |    | +         | 72           | 1×10 <sup>5</sup>   | S           |
| 54        | r1,5,8         |                |     |    |    |    |    |   |    | ++++      | 48           | 3.6×10 <sup>4</sup> | S,M         |
| 64        | r2,4,6         |                |     |    |    |    |    |   |    | -/+       | 72           | 1.6×10 <sup>5</sup> | M           |
| 65        | r2,4,7         |                |     |    |    |    |    |   |    | +         | 72           | 4.1×10 <sup>6</sup> | S           |
| 69        | r2,5,8         |                |     |    |    |    |    |   |    | +         | 72           | 3.9×10 <sup>6</sup> | S           |
| 74        | r3,4,6         |                |     |    |    |    |    |   |    | -/+       | 72           | 3×10 <sup>4</sup>   | M           |
| 75        | r3,4,7         |                |     |    |    |    |    |   |    | +         | 72           | 7.8×10 <sup>5</sup> | S,M         |
| 81        | r3,6,8         |                |     |    |    |    |    |   |    | -/+       | 72           | 1×10 <sup>4</sup>   | S           |
| 85        | r4,5,8         |                |     |    |    |    |    |   |    | +         | 72           | 6.6×10 <sup>5</sup> | S           |
| 86        | r4,6,7         |                |     |    |    |    |    |   |    | +         | 72           | 2.8×10 <sup>5</sup> | S           |
| 88        | r4,7,8         |                |     |    |    |    |    |   |    | +         | 72           | 7.7×10 <sup>4</sup> | S           |
| 90        | r5,6,8         |                |     |    |    |    |    |   |    | +         | 72           | 1.5×10 <sup>5</sup> | S           |
| 93        | r1,2,3,4       |                |     |    |    |    |    |   |    | +         | 72           | 7×10 <sup>6</sup>   | M           |
| 94        | r1,2,3,5       |                |     |    |    |    |    |   |    | +         | 72           | 2.8×10 <sup>4</sup> | S           |
| 99        | r1,2,4,6       |                |     |    |    |    |    |   |    | +         | 72           | 2.3×10 <sup>6</sup> | L           |
| 100       | r1,2,4,7       |                |     |    |    |    |    |   |    | +         | 72           | 2.1×10 <sup>6</sup> | M,L         |
| 101       | r1,2,4,8       |                |     |    |    |    |    |   |    | +++       | 48           | 4.2×10 <sup>6</sup> | L           |
| 102       | r1,2,5,6       |                |     |    |    |    |    |   |    | -/+       | 72           | 6.6×10 <sup>5</sup> | S           |
| 103       | r1,2,5,7       |                |     |    |    |    |    |   |    | -/+       | 72           | 2.2×10 <sup>5</sup> | S           |
| 104       | r1,2,5,8       |                |     |    |    |    |    |   |    | ++++      | 48           | 3.2×10 <sup>6</sup> | M,L         |
| 112       | r1,3,5,6       |                |     |    |    |    |    |   |    | -/+       | 72           | 1.7×10 <sup>4</sup> | S           |
| 114       | r1,3,5,8       |                |     |    |    |    |    |   |    | +/+       | 72           | 1.4×10 <sup>5</sup> | M           |
| 120       | r1,4,5,8       |                |     |    |    |    |    |   |    | +         | 72           | 8.4×10 <sup>4</sup> | S,M         |
| 121       | r1,4,6,7       |                |     |    |    |    |    |   |    | ++        | 72           | 7×10 <sup>6</sup>   | M           |
| 124       | r1,5,6,7       |                |     |    |    |    |    |   |    | +         | 72           | 2.8×10 <sup>6</sup> | S           |
| 125       | r1,5,6,8       |                |     |    |    |    |    |   |    | ++++      | 48           | 1.1×10 <sup>6</sup> | S           |
| 126       | r1,5,7,8       |                |     |    |    |    |    |   |    | ++++      | 48           | 7×10 <sup>6</sup>   | M,L         |
| 136       | r2,3,6,8       |                |     |    |    |    |    |   |    | +         | 72           | 6.1×10 <sup>4</sup> | S           |
| 140       | r2,4,5,8       |                |     |    |    |    |    |   |    | +/+       | 72           | 2.5×10 <sup>4</sup> | S           |
| 141       | r2,4,6,7       |                |     |    |    |    |    |   |    | +         | 72           | 2.1×10 <sup>6</sup> | S,M         |
| 142       | r2,4,6,8       |                |     |    |    |    |    |   |    | +         | 72           | 6×10 <sup>6</sup>   | M           |
| 143       | r2,4,7,8       |                |     |    |    |    |    |   |    | ++/+++    | 48           | 5.7×10 <sup>6</sup> | S           |
| 161       | r4,6,7,8       |                |     |    |    |    |    |   |    | -/+       | 72           | 3.1×10 <sup>6</sup> | S           |
| 163       | r1,2,3,4,5     |                |     |    |    |    |    |   |    | +         | 72           | 1.1×10 <sup>5</sup> | M           |
| 167       | r1,2,3,5,6     |                |     |    |    |    |    |   |    | +         | 72           | 8.1×10 <sup>6</sup> | S           |
| 169       | r1,2,3,5,8     |                |     |    |    |    |    |   |    | +++/>++++ | 48           | 1.5×10 <sup>6</sup> | M,L         |
| 173       | r1,2,4,5,6     |                |     |    |    |    |    |   |    | -/+       | 72           | 3.4×10 <sup>4</sup> | M,L         |
| 175       | r1,2,4,5,8     |                |     |    |    |    |    |   |    | +         | 72           | 6.1×10 <sup>4</sup> | M           |
| 176       | r1,2,4,6,7     |                |     |    |    |    |    |   |    | +         | 72           | 3.7×10 <sup>5</sup> | M           |
| 184       | r1,3,4,5,7     |                |     |    |    |    |    |   |    | +         | 72           | 1.9×10 <sup>5</sup> | M,L         |
| 185       | r1,3,4,5,8     |                |     |    |    |    |    |   |    | ++        | 72           | 1.4×10 <sup>5</sup> | S           |
| 189       | r1,3,5,6,7     |                |     |    |    |    |    |   |    | +         | 72           | 5.9×10 <sup>6</sup> | S,M         |
| 190       | r1,3,5,6,8     |                |     |    |    |    |    |   |    | +++       | 48           | 3.5×10 <sup>5</sup> | S           |
| 194       | r1,4,5,6,8     |                |     |    |    |    |    |   |    | +         | 72           | 2.8×10 <sup>5</sup> | S,M         |
| 195       | r1,4,5,7,8     |                |     |    |    |    |    |   |    | ++++      | 48           | 7.2×10 <sup>5</sup> | S,M         |
| 196       | r1,4,6,7,8     |                |     |    |    |    |    |   |    | ++        | 72           | 7×10 <sup>6</sup>   | M,L         |
| 209       | r2,4,5,6,8     |                |     |    |    |    |    |   |    | ++        | 72           | 2.2×10 <sup>4</sup> | S           |
| 211       | r2,4,6,7,8     |                |     |    |    |    |    |   |    | +++       | 48           | 2.3×10 <sup>6</sup> | S,M         |
| 219       | r1,2,3,4,5,6   |                |     |    |    |    |    |   |    | +         | 72           | 1.1×10 <sup>6</sup> | M           |
| 220       | r1,2,3,4,5,7   |                |     |    |    |    |    |   |    | +         | 72           | 4×10 <sup>6</sup>   | M           |
| 222       | r1,2,3,4,6,7   |                |     |    |    |    |    |   |    | -/+       | 72           | 3.9×10 <sup>6</sup> | M           |
| 225       | r1,2,3,5,6,7   |                |     |    |    |    |    |   |    | +         | 72           | 7×10 <sup>6</sup>   | S           |
| 230       | r1,2,4,5,6,8   |                |     |    |    |    |    |   |    | ++        | 72           | 1.3×10 <sup>6</sup> | S,M         |
| 231       | r1,2,4,5,7,8   |                |     |    |    |    |    |   |    | ++++      | 48           | 1×10 <sup>6</sup>   | S           |
| 232       | r1,2,4,6,7,8   |                |     |    |    |    |    |   |    | +/+       | 72           | 3.6×10 <sup>6</sup> | M           |
| 234       | r1,3,4,5,6,7   |                |     |    |    |    |    |   |    | +         | 72           | 1.2×10 <sup>5</sup> | M           |
| 235       | r1,3,4,5,6,8   |                |     |    |    |    |    |   |    | +/+       | 72           | 1.6×10 <sup>5</sup> | S,M         |
| 239       | r1,4,5,6,7,8   |                |     |    |    |    |    |   |    | +         | 72           | 1.4×10 <sup>6</sup> | S,M         |
| 247       | r1,2,3,4,5,6,7 |                |     |    |    |    |    |   |    | +         | 72           | 3.5×10 <sup>6</sup> | M,L         |
| 252       | r1,2,4,5,6,7,8 |                |     |    |    |    |    |   |    | +         | 72           | 7.7×10 <sup>5</sup> | S,M         |

Symbols and nomenclature of reassortant viruses are as described in [Table S1](#).

**Table S3. Low replicative reassortant viruses between SK06 (H5N1) and Tok07 (H3N2) viruses**

| Virus No. | Virus name   | Virus segments |     |    |    |    |    |   |    | CPE<br>48h | Aliquot<br>hour | Titer (pfu/mL)    | Plaque size |
|-----------|--------------|----------------|-----|----|----|----|----|---|----|------------|-----------------|-------------------|-------------|
|           |              | PB2            | PB1 | PA | HA | NP | NA | M | NS |            |                 |                   |             |
| 12        | r1,5         | █              | █   | █  | █  | █  | █  | █ | █  | +          | 72              | $1.7 \times 10^3$ | S           |
| 26        | r3,8         | █              | █   | █  | █  | █  | █  | █ | █  | ++         | 48              | $5.7 \times 10^3$ | S,M         |
| 39        | r1,2,5       | █              | █   | █  | █  | █  | █  | █ | █  | +          | 72              | $1.2 \times 10^3$ | S           |
| 61        | r2,3,7       | █              | █   | █  | █  | █  | █  | █ | █  | -          | 72              | $1.3 \times 10^2$ | S           |
| 62        | r2,3,8       | █              | █   | █  | █  | █  | █  | █ | █  | ++         | 72              | $2 \times 10^3$   | M           |
| 80        | r3,6,7       | █              | █   | █  | █  | █  | █  | █ | █  | -          | 72              | $5 \times 10^3$   | S           |
| 82        | r3,7,8       | █              | █   | █  | █  | █  | █  | █ | █  | + / ++     | 72              | $2.4 \times 10^2$ | M           |
| 98        | r1,2,4,5     | █              | █   | █  | █  | █  | █  | █ | █  | +          | 72              | $2 \times 10^1$   | S           |
| 108       | r1,3,4,5     | █              | █   | █  | █  | █  | █  | █ | █  | + / -      | 72              | $2.8 \times 10^3$ | S           |
| 118       | r1,4,5,6     | █              | █   | █  | █  | █  | █  | █ | █  | - / +      | 72              | $1.7 \times 10^2$ | S,M         |
| 119       | r1,4,5,7     | █              | █   | █  | █  | █  | █  | █ | █  | - / +      | 72              | $7 \times 10^1$   | S,M,L       |
| 131       | r2,3,4,8     | █              | █   | █  | █  | █  | █  | █ | █  | - / +      | 72              | $1 \times 10^1$   | S           |
| 137       | r2,3,7,8     | █              | █   | █  | █  | █  | █  | █ | █  | +          | 72              | $3 \times 10^2$   | S,M         |
| 145       | r2,5,6,8     | █              | █   | █  | █  | █  | █  | █ | █  | -          | 72              | $9.7 \times 10^3$ | S           |
| 157       | r3,6,7,8     | █              | █   | █  | █  | █  | █  | █ | █  | -          | 72              | $1.3 \times 10^2$ | S           |
| 162       | r5,6,7,8     | █              | █   | █  | █  | █  | █  | █ | █  | - / +      | 72              | $1.5 \times 10^3$ | S           |
| 210       | r2,4,5,7,8   | █              | █   | █  | █  | █  | █  | █ | █  | - / +      | 72              | $6 \times 10^1$   | S           |
| 212       | r2,5,6,7,8   | █              | █   | █  | █  | █  | █  | █ | █  | -          | 72              | $3.3 \times 10^3$ | S           |
| 229       | r1,2,4,5,6,7 | █              | █   | █  | █  | █  | █  | █ | █  | +          | 72              | $3.1 \times 10^2$ | S           |
| 245       | r2,4,5,6,7,8 | █              | █   | █  | █  | █  | █  | █ | █  | - / +      | 72              | $2.8 \times 10^2$ | M           |

Symbols and nomenclature of reassortant viruses are as described in [Table S1](#).

**Table S4. Nonviable reassortant viruses between SK06 (H5N1) and Tok07 (H3N2) viruses**

| Virus No. | Virus name     | Virus segments |     |    |    |    |    |   |    | CPE<br>48h | Aliquot<br>hour | Titer (pfu/mL) |
|-----------|----------------|----------------|-----|----|----|----|----|---|----|------------|-----------------|----------------|
|           |                | PB2            | PB1 | PA | HA | NP | NA | M | NS |            |                 |                |
| 5         | r5             |                |     |    |    |    |    |   |    | -          | 72              | 0              |
| 18        | r2,5           |                |     |    |    |    |    |   |    | -          | 72              | 0              |
| 23        | r3,5           |                |     |    |    |    |    |   |    | -          | 72              | 0              |
| 27        | r4,5           |                |     |    |    |    |    |   |    | -          | 72              | 0              |
| 31        | r5,6           |                |     |    |    |    |    |   |    | -          | 72              | 0              |
| 32        | r5,7           |                |     |    |    |    |    |   |    | -          | 72              | 0              |
| 48        | r1,4,5         |                |     |    |    |    |    |   |    | -          | 72              | 0              |
| 58        | r2,3,4         |                |     |    |    |    |    |   |    | -          | 72              | 0              |
| 59        | r2,3,5         |                |     |    |    |    |    |   |    | -          | 72              | 0              |
| 60        | r2,3,6         |                |     |    |    |    |    |   |    | -          | 72              | 0              |
| 63        | r2,4,5         |                |     |    |    |    |    |   |    | -          | 72              | 0              |
| 67        | r2,5,6         |                |     |    |    |    |    |   |    | -          | 72              | 0              |
| 68        | r2,5,7         |                |     |    |    |    |    |   |    | -          | 72              | 0              |
| 73        | r3,4,5         |                |     |    |    |    |    |   |    | -          | 72              | 0              |
| 76        | r3,4,8         |                |     |    |    |    |    |   |    | -          | 72              | 0              |
| 77        | r3,5,6         |                |     |    |    |    |    |   |    | -          | 72              | 0              |
| 78        | r3,5,7         |                |     |    |    |    |    |   |    | -          | 72              | 0              |
| 79        | r3,5,8         |                |     |    |    |    |    |   |    | -          | 72              | 0              |
| 83        | r4,5,6         |                |     |    |    |    |    |   |    | -          | 72              | 0              |
| 84        | r4,5,7         |                |     |    |    |    |    |   |    | -          | 72              | 0              |
| 89        | r5,6,7         |                |     |    |    |    |    |   |    | -          | 72              | 0              |
| 128       | r2,3,4,5       |                |     |    |    |    |    |   |    | -          | 72              | 0              |
| 129       | r2,3,4,6       |                |     |    |    |    |    |   |    | -          | 72              | 0              |
| 130       | r2,3,4,7       |                |     |    |    |    |    |   |    | -          | 72              | 0              |
| 132       | r2,3,5,6       |                |     |    |    |    |    |   |    | -          | 72              | 0              |
| 133       | r2,3,5,7       |                |     |    |    |    |    |   |    | -          | 72              | 0              |
| 134       | r2,3,5,8       |                |     |    |    |    |    |   |    | -          | 72              | 0              |
| 135       | r2,3,6,7       |                |     |    |    |    |    |   |    | -          | 72              | 0              |
| 138       | r2,4,5,6       |                |     |    |    |    |    |   |    | -          | 72              | 0              |
| 139       | r2,4,5,7       |                |     |    |    |    |    |   |    | -          | 72              | 0              |
| 144       | r2,5,6,7       |                |     |    |    |    |    |   |    | -          | 72              | 0              |
| 148       | r3,4,5,6       |                |     |    |    |    |    |   |    | -          | 72              | 0              |
| 149       | r3,4,5,7       |                |     |    |    |    |    |   |    | -          | 72              | 0              |
| 150       | r3,4,5,8       |                |     |    |    |    |    |   |    | -          | 72              | 0              |
| 151       | r3,4,6,7       |                |     |    |    |    |    |   |    | -          | 72              | 0              |
| 152       | r3,4,6,8       |                |     |    |    |    |    |   |    | -          | 72              | 0              |
| 153       | r3,4,7,8       |                |     |    |    |    |    |   |    | -          | 72              | 0              |
| 154       | r3,5,6,7       |                |     |    |    |    |    |   |    | -          | 72              | 0              |
| 155       | r3,5,6,8       |                |     |    |    |    |    |   |    | -          | 72              | 0              |
| 156       | r3,5,7,8       |                |     |    |    |    |    |   |    | -          | 72              | 0              |
| 158       | r4,5,6,7       |                |     |    |    |    |    |   |    | -          | 72              | 0              |
| 159       | r4,5,6,8       |                |     |    |    |    |    |   |    | -          | 72              | 0              |
| 160       | r4,5,7,8       |                |     |    |    |    |    |   |    | -          | 72              | 0              |
| 174       | r1,2,4,5,7     |                |     |    |    |    |    |   |    | -          | 72              | 0              |
| 183       | r1,3,4,5,6     |                |     |    |    |    |    |   |    | -          | 72              | 0              |
| 193       | r1,4,5,6,7     |                |     |    |    |    |    |   |    | -          | 72              | 0              |
| 198       | r2,3,4,5,6     |                |     |    |    |    |    |   |    | -          | 72              | 0              |
| 199       | r2,3,4,5,7     |                |     |    |    |    |    |   |    | -          | 72              | 0              |
| 200       | r2,3,4,5,8     |                |     |    |    |    |    |   |    | -          | 72              | 0              |
| 201       | r2,3,4,6,7     |                |     |    |    |    |    |   |    | -          | 72              | 0              |
| 202       | r2,3,4,6,8     |                |     |    |    |    |    |   |    | -          | 72              | 0              |
| 203       | r2,3,4,7,8     |                |     |    |    |    |    |   |    | -          | 72              | 0              |
| 204       | r2,3,5,6,7     |                |     |    |    |    |    |   |    | -          | 72              | 0              |
| 205       | r2,3,5,6,8     |                |     |    |    |    |    |   |    | -          | 72              | 0              |
| 206       | r2,3,5,7,8     |                |     |    |    |    |    |   |    | -          | 72              | 0              |
| 207       | r2,3,6,7,8     |                |     |    |    |    |    |   |    | -          | 72              | 0              |
| 208       | r2,4,5,6,7     |                |     |    |    |    |    |   |    | -          | 72              | 0              |
| 213       | r3,4,5,6,7     |                |     |    |    |    |    |   |    | -          | 72              | 0              |
| 214       | r3,4,5,6,8     |                |     |    |    |    |    |   |    | -          | 72              | 0              |
| 215       | r3,4,5,7,8     |                |     |    |    |    |    |   |    | -          | 72              | 0              |
| 216       | r3,4,6,7,8     |                |     |    |    |    |    |   |    | -          | 72              | 0              |
| 217       | r3,5,6,7,8     |                |     |    |    |    |    |   |    | -          | 72              | 0              |
| 218       | r4,5,6,7,8     |                |     |    |    |    |    |   |    | -          | 72              | 0              |
| 240       | r2,3,4,5,6,7   |                |     |    |    |    |    |   |    | -          | 72              | 0              |
| 241       | r2,3,4,5,6,8   |                |     |    |    |    |    |   |    | -          | 72              | 0              |
| 242       | r2,3,4,5,7,8   |                |     |    |    |    |    |   |    | -          | 72              | 0              |
| 243       | r2,3,4,6,7,8   |                |     |    |    |    |    |   |    | -          | 72              | 0              |
| 244       | r2,3,5,6,7,8   |                |     |    |    |    |    |   |    | -          | 72              | 0              |
| 246       | r3,4,5,6,7,8   |                |     |    |    |    |    |   |    | -          | 72              | 0              |
| 254       | r2,3,4,5,6,7,8 |                |     |    |    |    |    |   |    | -          | 72              | 0              |

Symbols and nomenclature of reassortant viruses are as described in Table S1. The nonviability (determined by the absence of CPE and pfu titer) of these reassortant viruses was validated by two independent rescue experiments. The reassortant viruses highlighted in gray indicate the 32 combinations of reassortant viruses that contained the two combinations of the ribonucleo-protein complex,  $S_{PB2}S_{PB1}T_{PA}T_{NP}$  and  $S_{PB2}T_{PB1}T_{PA}T_{NP}$ , that had the lowest activity in the minigenome assay.

**Table S5. Contribution of Tok07 PB1 to the pathogenicity of the reassortant viruses**

| Virus no. | Virus name | MLD <sub>50</sub> , pfu | Weight change, % | MST, days | Virus no. | Virus name     | MLD <sub>50</sub> , pfu | Weight change, % | MST, days |
|-----------|------------|-------------------------|------------------|-----------|-----------|----------------|-------------------------|------------------|-----------|
| 2         | r2         | ≥ 10 <sup>4.5</sup>     | +0.1             | > 14      | 57        | r1,7,8         | 10 <sup>3.3</sup>       | -(> 20.0)        | 9         |
| 16        | r2,3       | ≥ 10 <sup>4.5</sup>     | -10.5            | > 14      | 107       | r1,2,7,8       | 56.2                    | -(> 20.0)        | 7         |
| 19        | r2,6       | ≥ 10 <sup>4.5</sup>     | +14.9            | > 14      |           |                |                         |                  |           |
| 20        | r2,7       | ≥ 10 <sup>4.5</sup>     | +12.5            | > 14      | 113       | r1,3,5,7       | 10 <sup>3.5</sup>       | -(> 20.0)        | 11.5      |
| 21        | r2,8       | ≥ 10 <sup>4.5</sup>     | +21.3            | > 14      | 168       | r1,2,3,5,7     | 10 <sup>3.3</sup>       | -(> 20.0)        | 9.3       |
| 69        | r2,5,8     | ≥ 10 <sup>4.5</sup>     | +21.3            | > 14      |           |                |                         |                  |           |
| 70        | r2,6,7     | ≥ 10 <sup>4.5</sup>     | +12.7            | > 14      | 115       | r1,3,6,7       | ≥ 10 <sup>4.5</sup>     | -11.4            | > 14      |
| 71        | r2,6,8     | ≥ 10 <sup>4.5</sup>     | +12.1            | > 14      | 170       | r1,2,3,6,7     | 10 <sup>4.3</sup>       | -17.8            | 13        |
| 72        | r2,7,8     | ≥ 10 <sup>4.5</sup>     | +18.9            | > 14      |           |                |                         |                  |           |
| 146       | r2,5,7,8   | ≥ 10 <sup>4.5</sup>     | +7.1             | > 14      | 116       | r1,3,6,8       | ≥ 10 <sup>4.5</sup>     | +12.1            | > 14      |
| 147       | r2,6,7,8   | ≥ 10 <sup>4.5</sup>     | +14.1            | > 14      | 171       | r1,2,3,6,8     | ≥ 10 <sup>4.5</sup>     | +7.0             | > 14      |
| 1         | r1         | 3.2                     | -(> 20.0)        | 7.3       | 117       | r1,3,7,8       | 10 <sup>2.5</sup>       | -(> 20.0)        | 11.8      |
| 9         | r1,2       | 1.8                     | -(> 20.0)        | 7         | 172       | r1,2,3,7,8     | 10 <sup>2.5</sup>       | -(> 20.0)        | 8.8       |
| 10        | r1,3       | 10 <sup>4.3</sup>       | -19.4            | 13.5      | 124       | r1,5,6,7       | ≥ 10 <sup>4.5</sup>     | +13.9            | > 14      |
| 37        | r1,2,3     | 10 <sup>3.3</sup>       | -(> 20.0)        | 7.8       | 179       | r1,2,5,6,7     | ≥ 10 <sup>4.5</sup>     | +12.2            | > 14      |
| 13        | r1,6       | 17.8                    | -(> 20.0)        | 7.8       | 125       | r1,5,6,8       | ≥ 10 <sup>4.5</sup>     | +10.4            | > 14      |
| 40        | r1,2,6     | 17.8                    | -(> 20.0)        | 6.8       | 180       | r1,2,5,6,8     | 10 <sup>2.8</sup>       | -(> 20.0)        | 9.3       |
| 14        | r1,7       | 10 <sup>2.0</sup>       | -(> 20.0)        | 7.3       | 126       | r1,5,7,8       | ≥ 10 <sup>4.5</sup>     | +16.0            | > 14      |
| 41        | r1,2,7     | 56.2                    | -(> 20.0)        | 8         | 181       | r1,2,5,7,8     | 10 <sup>2.3</sup>       | -(> 20.0)        | 7         |
| 15        | r1,8       | ≥ 10 <sup>4.5</sup>     | -15.0            | > 14      | 127       | r1,6,7,8       | ≥ 10 <sup>4.5</sup>     | +15.7            | > 14      |
| 42        | r1,2,8     | 10                      | -(> 20.0)        | 7.3       | 182       | r1,2,6,7,8     | ≥ 10 <sup>4.5</sup>     | +12.8            | > 14      |
| 45        | r1,3,6     | 10 <sup>4.0</sup>       | -16.5            | 13.3      | 189       | r1,3,5,6,7     | ≥ 10 <sup>4.5</sup>     | +13.0            | > 14      |
| 95        | r1,2,3,6   | 10 <sup>3.0</sup>       | -(> 20.0)        | 11.8      | 225       | r1,2,3,5,6,7   | ≥ 10 <sup>4.5</sup>     | +4.1             | > 14      |
| 46        | r1,3,7     | 10 <sup>2.5</sup>       | -(> 20.0)        | 7         | 191       | r1,3,5,7,8     | 10 <sup>4.3</sup>       | -15.4            | 12.8      |
| 96        | r1,2,3,7   | 56.2                    | -(> 20.0)        | 6         | 227       | r1,2,3,5,7,8   | 10 <sup>2.5</sup>       | -(> 20.0)        | 8.8       |
| 47        | r1,3,8     | ≥ 10 <sup>4.5</sup>     | +11.8            | > 14      | 192       | r1,3,6,7,8     | ≥ 10 <sup>4.5</sup>     | +11.5            | > 14      |
| 97        | r1,2,3,8   | ≥ 10 <sup>4.5</sup>     | +13.0            | > 14      | 228       | r1,2,3,6,7,8   | ≥ 10 <sup>4.5</sup>     | +21.0            | > 14      |
| 55        | r1,6,7     | 10 <sup>4.0</sup>       | -18.9            | 12.3      | 197       | r1,5,6,7,8     | ≥ 10 <sup>4.5</sup>     | +16.0            | > 14      |
| 105       | r1,2,6,7   | 10 <sup>3.5</sup>       | -16.7            | 8.5       | 233       | r1,2,5,6,7,8   | ≥ 10 <sup>4.5</sup>     | +9.6             | > 14      |
| 56        | r1,6,8     | 10 <sup>3.8</sup>       | -15.9            | 13        | 238       | r1,3,5,6,7,8   | ≥ 10 <sup>4.5</sup>     | +12.8            | > 14      |
| 106       | r1,2,6,8   | 10 <sup>2.0</sup>       | -(> 20.0)        | 7.5       | 251       | r1,2,3,5,6,7,8 | ≥ 10 <sup>4.5</sup>     | +9.9             | > 14      |

This table was derived from Tables 1, 2, and 3 and was used to evaluate the contribution of Tok07 PB1 to the pathogenicity of the reassortant viruses. The first 11 viruses, from r2 to r2,6,7,8, contained Tok07 PB1 with SK06 PB2 and were all of low pathogenicity in mice. The viruses from r1 to r1,2,3,5,6,7,8 all contained Tok07 PB2 and are listed as pairs of viruses with or without Tok07 PB1. The pathogenicity of the two viruses in each pair was compared. MLD<sub>50</sub>, mouse LD<sub>50</sub>; MST, mean survival time of the mice infected with 10<sup>4</sup> pfu.

**Table S6. Contribution of Tok07 NP to the pathogenicity of the reassortant viruses**

| Virus no. | Virus name     | MLD <sub>50</sub> , pfu | Weight change, % | MST, days | Virus no. | Virus name   | MLD <sub>50</sub> , pfu | Weight change, % | MST, days |
|-----------|----------------|-------------------------|------------------|-----------|-----------|--------------|-------------------------|------------------|-----------|
| 33        | r5,8           | ≥ 10 <sup>4.5</sup>     | +9.7             | > 14      | 46        | r1,3,7       | 10 <sup>2.5</sup>       | -(> 20.0)        | 7         |
| 52        | r1,5,6         | ≥ 10 <sup>4.5</sup>     | +3.9             | > 14      | 113       | r1,3,5,7     | 10 <sup>3.5</sup>       | -(> 20.0)        | 11.5      |
| 69        | r2,5,8         | ≥ 10 <sup>4.5</sup>     | +21.3            | > 14      |           |              |                         |                  |           |
| 91        | r5,7,8         | ≥ 10 <sup>4.5</sup>     | +14.8            | > 14      | 96        | r1,2,3,7     | 56.2                    | -(> 20.0)        | 6         |
| 104       | r1,2,5,8       | ≥ 10 <sup>4.5</sup>     | +10.4            | > 14      | 168       | r1,2,3,5,7   | 10 <sup>3.3</sup>       | -(> 20.0)        | 9.3       |
| 124       | r1,5,6,7       | ≥ 10 <sup>4.5</sup>     | +13.9            | > 14      |           |              |                         |                  |           |
| 125       | r1,5,6,8       | ≥ 10 <sup>4.5</sup>     | +10.4            | > 14      | 106       | r1,2,6,8     | 10 <sup>2.0</sup>       | -(> 20.0)        | 7.5       |
| 126       | r1,5,7,8       | ≥ 10 <sup>4.5</sup>     | +16.0            | > 14      | 180       | r1,2,5,6,8   | 10 <sup>2.8</sup>       | -(> 20.0)        | 9.3       |
| 146       | r2,5,7,8       | ≥ 10 <sup>4.5</sup>     | +7.1             | > 14      |           |              |                         |                  |           |
| 167       | r1,2,3,5,6     | ≥ 10 <sup>4.5</sup>     | +10.7            | > 14      | 107       | r1,2,7,8     | 56.2                    | -(> 20.0)        | 7         |
| 169       | r1,2,3,5,8     | ≥ 10 <sup>4.5</sup>     | +16.1            | > 14      | 181       | r1,2,5,7,8   | 10 <sup>2.3</sup>       | -(> 20.0)        | 7         |
| 179       | r1,2,5,6,7     | ≥ 10 <sup>4.5</sup>     | +12.2            | > 14      |           |              |                         |                  |           |
| 189       | r1,3,5,6,7     | ≥ 10 <sup>4.5</sup>     | +13.0            | > 14      | 117       | r1,3,7,8     | 10 <sup>2.5</sup>       | -(> 20.0)        | 11.8      |
| 197       | r1,5,6,7,8     | ≥ 10 <sup>4.5</sup>     | +16.0            | > 14      | 191       | r1,3,5,7,8   | 10 <sup>4.3</sup>       | -15.4            | 12.8      |
| 225       | r1,2,3,5,6,7   | ≥ 10 <sup>4.5</sup>     | +4.1             | > 14      |           |              |                         |                  |           |
| 226       | r1,2,3,5,6,8   | ≥ 10 <sup>4.5</sup>     | +15.4            | > 14      | 172       | r1,2,3,7,8   | 10 <sup>2.5</sup>       | -(> 20.0)        | 8.8       |
| 233       | r1,2,5,6,7,8   | ≥ 10 <sup>4.5</sup>     | +9.6             | > 14      | 227       | r1,2,3,5,7,8 | 10 <sup>2.5</sup>       | -(> 20.0)        | 8.8       |
| 238       | r1,3,5,6,7,8   | ≥ 10 <sup>4.5</sup>     | +12.8            | > 14      |           |              |                         |                  |           |
| 251       | r1,2,3,5,6,7,8 | ≥ 10 <sup>4.5</sup>     | +9.9             | > 14      |           |              |                         |                  |           |

This table was derived from Tables 1, 2, and 3 and was used to evaluate the contribution of Tok07 NP to the pathogenicity of the reassortant viruses. The viruses from r5,8 to r1,2,3,5,6,7,8 contained Tok07 NP and were all of low pathogenicity in mice. The viruses from r1,3,7 to r1,2,3,5,7,8 are listed as pairs of viruses with or without Tok07 NP. The pathogenicity of the two viruses in each pair was compared.

**Table S7. Contribution of Tok07 PA to the pathogenicity of the reassortant viruses**

| Virus no. | Virus name | MLD <sub>50</sub> , pfu | Weight change, % | MST, days | Virus no. | Virus name     | MLD <sub>50</sub> , pfu | Weight change, % | MST, days |
|-----------|------------|-------------------------|------------------|-----------|-----------|----------------|-------------------------|------------------|-----------|
| 3         | r3         | ≥ 10 <sup>4.5</sup>     | -6.2             | > 14      |           |                |                         |                  |           |
| 16        | r2,3       | ≥ 10 <sup>4.5</sup>     | -10.5            | > 14      | 105       | r1,2,6,7       | 10 <sup>3.5</sup>       | -16.7            | 8.5       |
| 25        | r3,7       | ≥ 10 <sup>4.5</sup>     | -4.5             | > 14      | 170       | r1,2,3,6,7     | 10 <sup>4.3</sup>       | -17.8            | 13        |
| 1         | r1         | 3.2                     | -(> 20.0)        | 7.3       | 106       | r1,2,6,8       | 10 <sup>2.0</sup>       | -(> 20.0)        | 7.5       |
| 10        | r1,3       | 10 <sup>4.3</sup>       | -19.4            | 13.5      | 171       | r1,2,3,6,8     | ≥ 10 <sup>4.5</sup>     | +7.0             | > 14      |
| 9         | r1,2       | 1.8                     | -(> 20.0)        | 7         | 107       | r1,2,7,8       | 56.2                    | -(> 20.0)        | 7         |
| 37        | r1,2,3     | 10 <sup>3.3</sup>       | -(> 20.0)        | 7.8       | 172       | r1,2,3,7,8     | 10 <sup>2.5</sup>       | -(> 20.0)        | 8.8       |
| 13        | r1,6       | 17.8                    | -(> 20.0)        | 7.8       | 124       | r1,5,6,7       | ≥ 10 <sup>4.5</sup>     | +13.9            | > 14      |
| 45        | r1,3,6     | 10 <sup>4.0</sup>       | -16.5            | 13.3      | 189       | r1,3,5,6,7     | ≥ 10 <sup>4.5</sup>     | +13.0            | > 14      |
| 14        | r1,7       | 10 <sup>2.0</sup>       | -(> 20.0)        | 7.3       | 126       | r1,5,7,8       | ≥ 10 <sup>4.5</sup>     | +16.0            | > 14      |
| 46        | r1,3,7     | 10 <sup>2.5</sup>       | -(> 20.0)        | 7         | 191       | r1,3,5,7,8     | 10 <sup>4.3</sup>       | -15.4            | 12.8      |
| 15        | r1,8       | ≥ 10 <sup>4.5</sup>     | -15.0            | > 14      | 127       | r1,6,7,8       | ≥ 10 <sup>4.5</sup>     | +15.7            | > 14      |
| 47        | r1,3,8     | ≥ 10 <sup>4.5</sup>     | +11.8            | > 14      | 192       | r1,3,6,7,8     | ≥ 10 <sup>4.5</sup>     | +11.5            | > 14      |
| 40        | r1,2,6     | 17.8                    | -(> 20.0)        | 6.8       | 179       | r1,2,5,6,7     | ≥ 10 <sup>4.5</sup>     | +12.2            | > 14      |
| 95        | r1,2,3,6   | 10 <sup>3.0</sup>       | -(> 20.0)        | 11.8      | 225       | r1,2,3,5,6,7   | ≥ 10 <sup>4.5</sup>     | +4.1             | > 14      |
| 41        | r1,2,7     | 56.2                    | -(> 20.0)        | 8         | 180       | r1,2,5,6,8     | 10 <sup>2.8</sup>       | -(> 20.0)        | 9.3       |
| 96        | r1,2,3,7   | 56.2                    | -(> 20.0)        | 6         | 226       | r1,2,3,5,6,8   | ≥ 10 <sup>4.5</sup>     | +15.4            | > 14      |
| 42        | r1,2,8     | 10                      | -(> 20.0)        | 7.3       | 181       | r1,2,5,7,8     | 10 <sup>2.3</sup>       | -(> 20.0)        | 7         |
| 97        | r1,2,3,8   | ≥ 10 <sup>4.5</sup>     | +13.0            | > 14      | 227       | r1,2,3,5,7,8   | 10 <sup>2.5</sup>       | -(> 20.0)        | 8.8       |
| 55        | r1,6,7     | 10 <sup>4.0</sup>       | -18.9            | 12.3      | 182       | r1,2,6,7,8     | ≥ 10 <sup>4.5</sup>     | +12.8            | > 14      |
| 115       | r1,3,6,7   | ≥ 10 <sup>4.5</sup>     | -11.4            | > 14      | 228       | r1,2,3,6,7,8   | ≥ 10 <sup>4.5</sup>     | +21.0            | > 14      |
| 56        | r1,6,8     | 10 <sup>3.8</sup>       | -15.9            | 13        | 197       | r1,5,6,7,8     | ≥ 10 <sup>4.5</sup>     | +16.0            | > 14      |
| 116       | r1,3,6,8   | ≥ 10 <sup>4.5</sup>     | +12.1            | > 14      | 238       | r1,3,5,6,7,8   | ≥ 10 <sup>4.5</sup>     | +12.8            | > 14      |
| 57        | r1,7,8     | 10 <sup>3.3</sup>       | -(> 20.0)        | 9         | 233       | r1,2,5,6,7,8   | ≥ 10 <sup>4.5</sup>     | +9.6             | > 14      |
| 117       | r1,3,7,8   | 10 <sup>2.5</sup>       | -(> 20.0)        | 11.8      | 251       | r1,2,3,5,6,7,8 | ≥ 10 <sup>4.5</sup>     | +9.9             | > 14      |
| 104       | r1,2,5,8   | ≥ 10 <sup>4.5</sup>     | +10.4            | > 14      |           |                |                         |                  |           |
| 169       | r1,2,3,5,8 | ≥ 10 <sup>4.5</sup>     | +16.1            | > 14      |           |                |                         |                  |           |

This table was derived from Tables 1, 2, and 3 and was used to evaluate the contribution of Tok07 PA to the pathogenicity of the reassortant viruses. The first three viruses, from r3 to r3,7, contained Tok07 PA with SK06 PB2 and were all of low pathogenicity in mice. The viruses from r1 to r1,2,3,5,6,7,8, which all contained Tok07 PB2, are listed as pairs of viruses with or without Tok07 PA. The pathogenicity of the two viruses in each pair was compared.

**Table S8. Contribution of Tok07 NA to the pathogenicity of the reassortant viruses**

| Virus no. | Virus name | MLD <sub>50</sub> , pfu | Weight change, % | MST, days | Virus no. | Virus name     | MLD <sub>50</sub> , pfu | Weight change, % | MST, days |
|-----------|------------|-------------------------|------------------|-----------|-----------|----------------|-------------------------|------------------|-----------|
| 6         | r6         | 10 <sup>4.3</sup>       | -13.6            | 12.8      | 57        | r1,7,8         | 10 <sup>3.3</sup>       | -(> 20.0)        | 9         |
| 19        | r2,6       | ≥ 10 <sup>4.5</sup>     | +14.9            | > 14      | 127       | r1,6,7,8       | ≥ 10 <sup>4.5</sup>     | +15.7            | > 14      |
| 34        | r6,7       | ≥ 10 <sup>4.5</sup>     | +11.6            | > 14      |           |                |                         |                  |           |
| 35        | r6,8       | ≥ 10 <sup>4.5</sup>     | +7.8             | > 14      | 96        | r1,2,3,7       | 56.2                    | -(> 20.0)        | 6         |
| 70        | r2,6,7     | ≥ 10 <sup>4.5</sup>     | +12.7            | > 14      | 170       | r1,2,3,6,7     | 10 <sup>4.3</sup>       | -17.8            | 13        |
| 71        | r2,6,8     | ≥ 10 <sup>4.5</sup>     | +12.1            | > 14      |           |                |                         |                  |           |
| 92        | r6,7,8     | ≥ 10 <sup>4.5</sup>     | +12.4            | > 14      | 97        | r1,2,3,8       | ≥ 10 <sup>4.5</sup>     | +13.0            | > 14      |
| 147       | r2,6,7,8   | ≥ 10 <sup>4.5</sup>     | +14.1            | > 14      | 171       | r1,2,3,6,8     | ≥ 10 <sup>4.5</sup>     | +7.0             | > 14      |
| 1         | r1         | 3.2                     | -(> 20.0)        | 7.3       | 104       | r1,2,5,8       | ≥ 10 <sup>4.5</sup>     | +10.4            | > 14      |
| 13        | r1,6       | 17.8                    | -(> 20.0)        | 7.8       | 180       | r1,2,5,6,8     | 10 <sup>2.8</sup>       | -(> 20.0)        | 9.3       |
| 9         | r1,2       | 1.8                     | -(> 20.0)        | 7         | 107       | r1,2,7,8       | 56.2                    | -(> 20.0)        | 7         |
| 40        | r1,2,6     | 17.8                    | -(> 20.0)        | 6.8       | 182       | r1,2,6,7,8     | ≥ 10 <sup>4.5</sup>     | +12.8            | > 14      |
| 10        | r1,3       | 10 <sup>4.3</sup>       | -19.4            | 13.5      | 113       | r1,3,5,7       | 10 <sup>3.5</sup>       | -(> 20.0)        | 11.5      |
| 45        | r1,3,6     | 10 <sup>4.0</sup>       | -16.5            | 13.3      | 189       | r1,3,5,6,7     | ≥ 10 <sup>4.5</sup>     | +13.0            | > 14      |
| 14        | r1,7       | 10 <sup>2.0</sup>       | -(> 20.0)        | 7.3       | 117       | r1,3,7,8       | 10 <sup>2.5</sup>       | -(> 20.0)        | 11.8      |
| 55        | r1,6,7     | 10 <sup>4.0</sup>       | -18.9            | 12.3      | 192       | r1,3,6,7,8     | ≥ 10 <sup>4.5</sup>     | +11.5            | > 14      |
| 15        | r1,8       | ≥ 10 <sup>4.5</sup>     | -15.0            | > 14      | 168       | r1,2,3,5,7     | 10 <sup>3.3</sup>       | -(> 20.0)        | 9.3       |
| 56        | r1,6,8     | 10 <sup>3.8</sup>       | -15.9            | 13        | 225       | r1,2,3,5,6,7   | ≥ 10 <sup>4.5</sup>     | +4.1             | > 14      |
| 37        | r1,2,3     | 10 <sup>3.3</sup>       | -(> 20.0)        | 7.8       | 169       | r1,2,3,5,8     | ≥ 10 <sup>4.5</sup>     | +16.1            | > 14      |
| 95        | r1,2,3,6   | 10 <sup>3.0</sup>       | -(> 20.0)        | 11.8      | 226       | r1,2,3,5,6,8   | ≥ 10 <sup>4.5</sup>     | +15.4            | > 14      |
| 41        | r1,2,7     | 56.2                    | -(> 20.0)        | 8         | 172       | r1,2,3,7,8     | 10 <sup>2.5</sup>       | -(> 20.0)        | 8.8       |
| 105       | r1,2,6,7   | 10 <sup>3.5</sup>       | -16.7            | 8.5       | 228       | r1,2,3,6,7,8   | ≥ 10 <sup>4.5</sup>     | +21.0            | > 14      |
| 42        | r1,2,8     | 10                      | -(> 20.0)        | 7.3       | 181       | r1,2,5,7,8     | 10 <sup>2.3</sup>       | -(> 20.0)        | 7         |
| 106       | r1,2,6,8   | 10 <sup>2.0</sup>       | -(> 20.0)        | 7.5       | 233       | r1,2,5,6,7,8   | ≥ 10 <sup>4.5</sup>     | +9.6             | > 14      |
| 46        | r1,3,7     | 10 <sup>2.5</sup>       | -(> 20.0)        | 7         | 191       | r1,3,5,7,8     | 10 <sup>4.3</sup>       | -15.4            | 12.8      |
| 115       | r1,3,6,7   | ≥ 10 <sup>4.5</sup>     | -11.4            | > 14      | 238       | r1,3,5,6,7,8   | ≥ 10 <sup>4.5</sup>     | +12.8            | > 14      |
| 47        | r1,3,8     | ≥ 10 <sup>4.5</sup>     | +11.8            | > 14      | 227       | r1,2,3,5,7,8   | 10 <sup>2.5</sup>       | -(> 20.0)        | 8.8       |
| 116       | r1,3,6,8   | ≥ 10 <sup>4.5</sup>     | +12.1            | > 14      | 251       | r1,2,3,5,6,7,8 | ≥ 10 <sup>4.5</sup>     | +9.9             | > 14      |

This table was derived from Tables 1, 2, and 3 and was used to evaluate the contribution of Tok07 NA to the pathogenicity of the reassortant viruses. The first eight viruses from r6 to r2,6,7,8 contained Tok07 NA with SK06 PB2 and were all of low pathogenicity in mice, except for r6, which showed a level of pathogenicity similar to that of the parental SK06 virus. The viruses from r1 to r1,2,3,5,6,7,8, which all contained Tok07 PB2, are listed as pairs of viruses with or without Tok07 NA. The pathogenicity of the two viruses in each pair was compared.

**Table S9. Contribution of Tok07 NS to the pathogenicity of the reassortant viruses**

| Virus no. | Virus name | MLD <sub>50</sub> , pfu | Weight change, % | MST, days | Virus no. | Virus name     | MLD <sub>50</sub> , pfu | Weight change, % | MST, days |
|-----------|------------|-------------------------|------------------|-----------|-----------|----------------|-------------------------|------------------|-----------|
| 8         | r8         | ≥ 10 <sup>4.5</sup>     | +14.1            | > 14      |           |                |                         |                  |           |
| 21        | r2,8       | ≥ 10 <sup>4.5</sup>     | +21.3            | > 14      | 52        | r1,5,6         | ≥ 10 <sup>4.5</sup>     | +3.9             | > 14      |
| 33        | r5,8       | ≥ 10 <sup>4.5</sup>     | +9.7             | > 14      | 125       | r1,5,6,8       | ≥ 10 <sup>4.5</sup>     | +10.4            | > 14      |
| 35        | r6,8       | ≥ 10 <sup>4.5</sup>     | +7.8             | > 14      |           |                |                         |                  |           |
| 36        | r7,8       | 10 <sup>4.3</sup>       | -18.5            | 13.5      | 55        | r1,6,7         | 10 <sup>4.0</sup>       | -18.9            | 12.3      |
| 69        | r2,5,8     | ≥ 10 <sup>4.5</sup>     | +21.3            | > 14      | 127       | r1,6,7,8       | ≥ 10 <sup>4.5</sup>     | +15.7            | > 14      |
| 71        | r2,6,8     | ≥ 10 <sup>4.5</sup>     | +12.1            | > 14      |           |                |                         |                  |           |
| 72        | r2,7,8     | ≥ 10 <sup>4.5</sup>     | +18.9            | > 14      | 95        | r1,2,3,6       | 10 <sup>3.0</sup>       | -(> 20.0)        | 11.8      |
| 91        | r5,7,8     | ≥ 10 <sup>4.5</sup>     | +14.8            | > 14      | 171       | r1,2,3,6,8     | ≥ 10 <sup>4.5</sup>     | +7.0             | > 14      |
| 92        | r6,7,8     | ≥ 10 <sup>4.5</sup>     | +12.4            | > 14      |           |                |                         |                  |           |
| 146       | r2,5,7,8   | ≥ 10 <sup>4.5</sup>     | +7.1             | > 14      | 96        | r1,2,3,7       | 56.2                    | -(> 20.0)        | 6         |
| 147       | r2,6,7,8   | ≥ 10 <sup>4.5</sup>     | +14.1            | > 14      | 172       | r1,2,3,7,8     | 10 <sup>2.5</sup>       | -(> 20.0)        | 8.8       |
| 1         | r1         | 3.2                     | -(> 20.0)        | 7.3       | 105       | r1,2,6,7       | 10 <sup>3.5</sup>       | -16.7            | 8.5       |
| 15        | r1,8       | ≥ 10 <sup>4.5</sup>     | -15.0            | > 14      | 182       | r1,2,6,7,8     | ≥ 10 <sup>4.5</sup>     | +12.8            | > 14      |
| 9         | r1,2       | 1.8                     | -(> 20.0)        | 7         | 113       | r1,3,5,7       | 10 <sup>3.5</sup>       | -(> 20.0)        | 11.5      |
| 42        | r1,2,8     | 10                      | -(> 20.0)        | 7.3       | 191       | r1,3,5,7,8     | 10 <sup>4.3</sup>       | -15.4            | 12.8      |
| 10        | r1,3       | 10 <sup>4.3</sup>       | -19.4            | 13.5      | 115       | r1,3,6,7       | ≥ 10 <sup>4.5</sup>     | -11.4            | > 14      |
| 47        | r1,3,8     | ≥ 10 <sup>4.5</sup>     | +11.8            | > 14      | 192       | r1,3,6,7,8     | ≥ 10 <sup>4.5</sup>     | +11.5            | > 14      |
| 13        | r1,6       | 17.8                    | -(> 20.0)        | 7.8       | 124       | r1,5,6,7       | ≥ 10 <sup>4.5</sup>     | +13.9            | > 14      |
| 56        | r1,6,8     | 10 <sup>3.8</sup>       | -15.9            | 13        | 197       | r1,5,6,7,8     | ≥ 10 <sup>4.5</sup>     | +16.0            | > 14      |
| 14        | r1,7       | 10 <sup>2.0</sup>       | -(> 20.0)        | 7.3       | 167       | r1,2,3,5,6     | ≥ 10 <sup>4.5</sup>     | +10.7            | > 14      |
| 57        | r1,7,8     | 10 <sup>3.3</sup>       | -(> 20.0)        | 9         | 226       | r1,2,3,5,6,8   | ≥ 10 <sup>4.5</sup>     | +15.4            | > 14      |
| 37        | r1,2,3     | 10 <sup>3.3</sup>       | -(> 20.0)        | 7.8       | 168       | r1,2,3,5,7     | 10 <sup>3.3</sup>       | -(> 20.0)        | 9.3       |
| 97        | r1,2,3,8   | ≥ 10 <sup>4.5</sup>     | +13.0            | > 14      | 227       | r1,2,3,5,7,8   | 10 <sup>2.5</sup>       | -(> 20.0)        | 8.8       |
| 40        | r1,2,6     | 17.8                    | -(> 20.0)        | 6.8       | 170       | r1,2,3,6,7     | 10 <sup>4.3</sup>       | -17.8            | 13        |
| 106       | r1,2,6,8   | 10 <sup>2.0</sup>       | -(> 20.0)        | 7.5       | 228       | r1,2,3,6,7,8   | ≥ 10 <sup>4.5</sup>     | +21.0            | > 14      |
| 41        | r1,2,7     | 56.2                    | -(> 20.0)        | 8         | 179       | r1,2,5,6,7     | ≥ 10 <sup>4.5</sup>     | +12.2            | > 14      |
| 107       | r1,2,7,8   | 56.2                    | -(> 20.0)        | 7         | 233       | r1,2,5,6,7,8   | ≥ 10 <sup>4.5</sup>     | +9.6             | > 14      |
| 45        | r1,3,6     | 10 <sup>4.0</sup>       | -16.5            | 13.3      | 189       | r1,3,5,6,7     | ≥ 10 <sup>4.5</sup>     | +13.0            | > 14      |
| 116       | r1,3,6,8   | ≥ 10 <sup>4.5</sup>     | +12.1            | > 14      | 238       | r1,3,5,6,7,8   | ≥ 10 <sup>4.5</sup>     | +12.8            | > 14      |
| 46        | r1,3,7     | 10 <sup>2.5</sup>       | -(> 20.0)        | 7         | 225       | r1,2,3,5,6,7   | ≥ 10 <sup>4.5</sup>     | +4.1             | > 14      |
| 117       | r1,3,7,8   | 10 <sup>2.5</sup>       | -(> 20.0)        | 11.8      | 251       | r1,2,3,5,6,7,8 | ≥ 10 <sup>4.5</sup>     | +9.9             | > 14      |

This table was derived from Tables 1, 2, and 3 and was used to evaluate the contribution of Tok07 NS to the pathogenicity of the reassortant viruses. The first 12 viruses, from r8 to r2,6,7,8, contained Tok07 NS with SK06 PB2 and were all of low pathogenicity in mice, except for r7,8, which showed a level of pathogenicity similar to that of the parental SK06 virus. The viruses from r1 to r1,2,3,5,6,7,8, which all contained Tok07 PB2, are listed as pairs of viruses with or without Tok07 NS. The pathogenicity of the two viruses in each pair was compared.

**Table S10. Contribution of Tok07 *M* to the pathogenicity of the reassortant viruses**

| Virus no. | Virus name | MLD <sub>50</sub> , pfu | Weight change, % | MST, days | Virus no. | Virus name     | MLD <sub>50</sub> , pfu | Weight change, % | MST, days |
|-----------|------------|-------------------------|------------------|-----------|-----------|----------------|-------------------------|------------------|-----------|
| 7         | r7         | ≥ 10 <sup>4.5</sup>     | -16.1            | > 14      | 52        | r1,5,6         | ≥ 10 <sup>4.5</sup>     | +3.9             | > 14      |
| 20        | r2,7       | ≥ 10 <sup>4.5</sup>     | +12.5            | > 14      | 124       | r1,5,6,7       | ≥ 10 <sup>4.5</sup>     | +13.9            | > 14      |
| 25        | r3,7       | ≥ 10 <sup>4.5</sup>     | -4.5             | > 14      |           |                |                         |                  |           |
| 34        | r6,7       | ≥ 10 <sup>4.5</sup>     | +11.6            | > 14      | 56        | r1,6,8         | 10 <sup>3.8</sup>       | -15.9            | 13        |
| 36        | r7,8       | 10 <sup>4.3</sup>       | -18.5            | 13.5      | 127       | r1,6,7,8       | ≥ 10 <sup>4.5</sup>     | +15.7            | > 14      |
| 70        | r2,6,7     | ≥ 10 <sup>4.5</sup>     | +12.7            | > 14      |           |                |                         |                  |           |
| 72        | r2,7,8     | ≥ 10 <sup>4.5</sup>     | +18.9            | > 14      | 95        | r1,2,3,6       | 10 <sup>3.0</sup>       | -(> 20.0)        | 11.8      |
| 91        | r5,7,8     | ≥ 10 <sup>4.5</sup>     | +14.8            | > 14      | 170       | r1,2,3,6,7     | 10 <sup>4.3</sup>       | -17.8            | 13        |
| 92        | r6,7,8     | ≥ 10 <sup>4.5</sup>     | +12.4            | > 14      |           |                |                         |                  |           |
| 146       | r2,5,7,8   | ≥ 10 <sup>4.5</sup>     | +7.1             | > 14      | 97        | r1,2,3,8       | ≥ 10 <sup>4.5</sup>     | +13.0            | > 14      |
| 147       | r2,6,7,8   | ≥ 10 <sup>4.5</sup>     | +14.1            | > 14      | 172       | r1,2,3,7,8     | 10 <sup>2.5</sup>       | -(> 20.0)        | 8.8       |
| 1         | r1         | 3.2                     | -(> 20.0)        | 7.3       | 104       | r1,2,5,8       | ≥ 10 <sup>4.5</sup>     | +10.4            | > 14      |
| 14        | r1,7       | 10 <sup>2.0</sup>       | -(> 20.0)        | 7.3       | 181       | r1,2,5,7,8     | 10 <sup>2.3</sup>       | -(> 20.0)        | 7         |
| 9         | r1,2       | 1.8                     | -(> 20.0)        | 7         | 106       | r1,2,6,8       | 10 <sup>2.0</sup>       | -(> 20.0)        | 7.5       |
| 41        | r1,2,7     | 56.2                    | -(> 20.0)        | 8         | 182       | r1,2,6,7,8     | ≥ 10 <sup>4.5</sup>     | +12.8            | > 14      |
| 10        | r1,3       | 10 <sup>4.3</sup>       | -19.4            | 13.5      | 116       | r1,3,6,8       | ≥ 10 <sup>4.5</sup>     | +12.1            | > 14      |
| 46        | r1,3,7     | 10 <sup>2.5</sup>       | -(> 20.0)        | 7         | 192       | r1,3,6,7,8     | ≥ 10 <sup>4.5</sup>     | +11.5            | > 14      |
| 13        | r1,6       | 17.8                    | -(> 20.0)        | 7.8       | 125       | r1,5,6,8       | ≥ 10 <sup>4.5</sup>     | +10.4            | > 14      |
| 55        | r1,6,7     | 10 <sup>4.0</sup>       | -18.9            | 12.3      | 197       | r1,5,6,7,8     | ≥ 10 <sup>4.5</sup>     | +16.0            | > 14      |
| 15        | r1,8       | ≥ 10 <sup>4.5</sup>     | -15.0            | > 14      | 167       | r1,2,3,5,6     | ≥ 10 <sup>4.5</sup>     | +10.7            | > 14      |
| 57        | r1,7,8     | 10 <sup>3.3</sup>       | -(> 20.0)        | 9         | 225       | r1,2,3,5,6,7   | ≥ 10 <sup>4.5</sup>     | +4.1             | > 14      |
| 37        | r1,2,3     | 10 <sup>3.3</sup>       | -(> 20.0)        | 7.8       | 169       | r1,2,3,5,8     | ≥ 10 <sup>4.5</sup>     | +16.1            | > 14      |
| 96        | r1,2,3,7   | 56.2                    | -(> 20.0)        | 6         | 227       | r1,2,3,5,7,8   | 10 <sup>2.5</sup>       | -(> 20.0)        | 8.8       |
| 40        | r1,2,6     | 17.8                    | -(> 20.0)        | 6.8       | 171       | r1,2,3,6,8     | ≥ 10 <sup>4.5</sup>     | +7.0             | > 14      |
| 105       | r1,2,6,7   | 10 <sup>3.5</sup>       | -16.7            | 8.5       | 228       | r1,2,3,6,7,8   | ≥ 10 <sup>4.5</sup>     | +21.0            | > 14      |
| 42        | r1,2,8     | 10                      | -(> 20.0)        | 7.3       | 180       | r1,2,5,6,8     | 10 <sup>2.8</sup>       | -(> 20.0)        | 9.3       |
| 107       | r1,2,7,8   | 56.2                    | -(> 20.0)        | 7         | 233       | r1,2,5,6,7,8   | ≥ 10 <sup>4.5</sup>     | +9.6             | > 14      |
| 45        | r1,3,6     | 10 <sup>4.0</sup>       | -16.5            | 13.3      | 226       | r1,2,3,5,6,8   | ≥ 10 <sup>4.5</sup>     | +15.4            | > 14      |
| 115       | r1,3,6,7   | ≥ 10 <sup>4.5</sup>     | -11.4            | > 14      | 251       | r1,2,3,5,6,7,8 | ≥ 10 <sup>4.5</sup>     | +9.9             | > 14      |
| 47        | r1,3,8     | ≥ 10 <sup>4.5</sup>     | +11.8            | > 14      |           |                |                         |                  |           |
| 117       | r1,3,7,8   | 10 <sup>2.5</sup>       | -(> 20.0)        | 11.8      |           |                |                         |                  |           |

This table was derived from Tables 1, 2, and 3 and was used to evaluate the contribution of Tok07 *M* to the pathogenicity of the reassortant viruses. The first 11 viruses, from r7 to r2,6,7,8, contained Tok07 *M* with SK06 *PB2* and were all of low pathogenicity in mice, except for r7,8, which showed a level of pathogenicity similar to that of the parental SK06 virus. The viruses from r1 to r1,2,3,5,6,7,8, which all contained Tok07 *PB2*, are listed as pairs of viruses with or without Tok07 *M*. The pathogenicity of the two viruses in each pair was compared.
